# Supplementary material
Source: publisher figshare collection journal article supplement (https://acs.figshare.com/ndownloader/files/16370201)
Supplement: Supplementary file 1 [file 16370201]

Compound	SMILES	GM (¦ÌM)	MHC (¦ÌM)	TI
1	O=C(N[C@@H](CCCNC(N)=N)C(N[C@@H](CC(C)C)C(N[C@@H](CCCNC(N)=N)C(N[C@@H](CCCCN)C(N[C@@H](CCCCN)C(N[C@@H]([C@H](O)C)C(N[C@@H](CCCNC(N)=N)C(N[C@@H](CCCCN)C(N[C@@H](CCCNC(N)=N)C(N[C@@H](CC(C)C)C(N[C@@H](CCCCN)C(N)=O)=O)=O)=O)=O)=O)=O)=O)=O)=O)=O)[C@H](CCCNC(N)=N)N	203.19	>128	1.26
2	O=C(N[C@@H](CC1=CNC2=CC=CC=C12)C(N[C@@H](CC(C)C)C(N[C@@H](CCCNC(N)=N)C(N[C@@H](CCCCN)C(N[C@@H](CC3=CNC4=CC=CC=C34)C(N[C@@H]([C@H](O)C)C(N[C@@H](CCCNC(N)=N)C(N[C@@H](CCCCN)C(N[C@@H](CCCNC(N)=N)C(N[C@@H](CC(C)C)C(N[C@@H](CCCCN)C(N)=O)=O)=O)=O)=O)=O)=O)=O)=O)=O)=O)[C@H](CCCNC(N)=N)N	28.51	>128	8.98
3	O=C(N[C@@H](CCCNC(N)=N)C(N[C@@H](CC(C)C)C(N[C@@H](CCCNC(N)=N)C(N[C@@H](CC1=CNC2=CC=CC=C12)C(N[C@@H](CCCCN)C(N[C@@H]([C@H](O)C)C(N[C@@H](CCCNC(N)=N)C(N[C@@H](CC3=CNC4=CC=CC=C34)C(N[C@@H](CCCNC(N)=N)C(N[C@@H](CC(C)C)C(N[C@@H](CCCCN)C(N)=O)=O)=O)=O)=O)=O)=O)=O)=O)=O)=O)[C@H](CCCNC(N)=N)N	14.25	>128	17.96
4	O=C(N[C@@H](CCCNC(N)=N)C(N[C@@H](CC(C)C)C(N[C@@H](CCCNC(N)=N)C(N[C@@H](CCCCN)C(N[C@@H](CCCCN)C(N[C@@H]([C@H](O)C)C(N[C@@H](CC1=CNC2=CC=CC=C12)C(N[C@@H](CCCCN)C(N[C@@H](CCCNC(N)=N)C(N[C@@H](CC(C)C)C(N[C@@H](CC3=CNC4=CC=CC=C34)C(N)=O)=O)=O)=O)=O)=O)=O)=O)=O)=O)=O)[C@H](CCCNC(N)=N)N	57.02	>128	4.49
5	O=C(N[C@@H](CC1=CNC2=CC=CC=C12)C(N[C@@H](CC(C)C)C(N[C@@H](CCCNC(N)=N)C(N[C@@H](CCCCN)C(N[C@@H](CC3=CNC4=CC=CC=C34)C(N[C@@H]([C@H](O)C)C(N[C@@H](CCCNC(N)=N)C(N[C@@H](CCCCN)C(N[C@@H](CC5=CNC6=CC=CC=C56)C(N[C@@H](CC(C)C)C(N[C@@H](CCCCN)C(N)=O)=O)=O)=O)=O)=O)=O)=O)=O)=O)=O)[C@H](CCCNC(N)=N)N	8	>128	32
6	O=C(N[C@@H](CCCNC(N)=N)C(N[C@@H](CC(C)C)C(N[C@@H](CCCNC(N)=N)C(N[C@@H](CC1=CNC2=CC=CC=C12)C(N[C@@H](CCCCN)C(N[C@@H]([C@H](O)C)C(N[C@@H](CCCNC(N)=N)C(N[C@@H](CC3=CNC4=CC=CC=C34)C(N[C@@H](CCCNC(N)=N)C(N[C@@H](CC(C)C)C(N[C@@H](CCCCN)C(N)=O)=O)=O)=O)=O)=O)=O)=O)=O)=O)=O)[C@H](CC5=CNC6=CC=CC=C56)N	2.83	>128	90.46
7	O=C(N[C@@H](CCCNC(N)=N)C(N[C@@H](CC(C)C)C(N[C@@H](CC1=CNC2=CC=CC=C12)C(N[C@@H](CCCCN)C(N[C@@H](CCCCN)C(N[C@@H]([C@H](O)C)C(N[C@@H](CC3=CNC4=CC=CC=C34)C(N[C@@H](CCCCN)C(N[C@@H](CCCNC(N)=N)C(N[C@@H](CC(C)C)C(N[C@@H](CC5=CNC6=CC=CC=C56)C(N)=O)=O)=O)=O)=O)=O)=O)=O)=O)=O)=O)[C@H](CCCNC(N)=N)N	7.13	>128	35.9
8	O=C(N[C@@H](CC1=CNC2=CC=CC=C12)C(N[C@@H](CC(C)C)C(N[C@@H](CCCNC(N)=N)C(N[C@@H](CC3=CNC4=CC=CC=C34)C(N[C@@H](CCCCN)C(N[C@@H]([C@H](O)C)C(N[C@@H](CCCNC(N)=N)C(N[C@@H](CC5=CNC6=CC=CC=C56)C(N[C@@H](CCCNC(N)=N)C(N[C@@H](CC(C)C)C(N[C@@H](CCCCN)C(N)=O)=O)=O)=O)=O)=O)=O)=O)=O)=O)=O)[C@H](CCCNC(N)=N)N	6.35	>128	40.31
9	O=C(N[C@@H](CCCNC(N)=N)C(N[C@@H](CC(C)C)C(N[C@@H](CCCNC(N)=N)C(N[C@@H](CC1=CNC2=CC=CC=C12)C(N[C@@H](CC3=CNC4=CC=CC=C34)C(N[C@@H]([C@H](O)C)C(N[C@@H](CCCNC(N)=N)C(N[C@@H](CC5=CNC6=CC=CC=C56)C(N[C@@H](CCCNC(N)=N)C(N[C@@H](CC(C)C)C(N[C@@H](CCCCN)C(N)=O)=O)=O)=O)=O)=O)=O)=O)=O)=O)=O)[C@H](CCCNC(N)=N)N	5.66	>128	45.23
10	O=C(N[C@@H](CCCNC(N)=N)C(N[C@@H](CC(C)C)C(N[C@@H](CCCNC(N)=N)C(N[C@@H](C(C)C)C(N[C@@H](CCCCN)C(N[C@@H]([C@H](O)C)C(N[C@@H](CCCNC(N)=N)C(N[C@@H](C(C)C)C(N[C@@H](CCCNC(N)=N)C(N[C@@H](CC(C)C)C(N[C@@H](CCCCN)C(N)=O)=O)=O)=O)=O)=O)=O)=O)=O)=O)=O)[C@H](C(C)C)N	14.25	>128	17.96
11	O=C(N[C@@H](CCCNC(N)=N)C(N[C@@H](CC(C)C)C(N[C@@H](CCCNC(N)=N)C(N[C@@H](CC(C)C)C(N[C@@H](CCCCN)C(N[C@@H]([C@H](O)C)C(N[C@@H](CCCNC(N)=N)C(N[C@@H](CC(C)C)C(N[C@@H](CCCNC(N)=N)C(N[C@@H](CC(C)C)C(N[C@@H](CCCCN)C(N)=O)=O)=O)=O)=O)=O)=O)=O)=O)=O)=O)[C@H](CC(C)C)N	16	>128	16
12	O=C(N[C@@H](CC1=CNC2=CC=CC=C12)C(N[C@@H](CC(C)C)C(N[C@@H](CCCNC(N)=N)C(N[C@@H](CC3=CNC4=CC=CC=C34)C(N[C@@H](CC5=CNC6=CC=CC=C56)C(N[C@@H]([C@H](O)C)C(N[C@@H](CCCNC(N)=N)C(N[C@@H](CC7=CNC8=CC=CC=C78)C(N[C@@H](CCCNC(N)=N)C(N[C@@H](CC(C)C)C(N[C@@H](CCCCN)C(N)=O)=O)=O)=O)=O)=O)=O)=O)=O)=O)=O)[C@H](CCCNC(N)=N)N	3.17	128	40.38
13	O=C(N[C@@H](CCCNC(N)=N)C(N[C@@H](C(C)C)C(N[C@@H](CCCNC(N)=N)C(N[C@@H](CC1=CNC2=CC=CC=C12)C(N[C@@H](CCCCN)C(N[C@@H]([C@H](O)C)C(N[C@@H](CCCNC(N)=N)C(N[C@@H](CC3=CNC4=CC=CC=C34)C(N[C@@H](CCCNC(N)=N)C(N[C@@H](C(C)C)C(N[C@@H](CCCCN)C(N)=O)=O)=O)=O)=O)=O)=O)=O)=O)=O)=O)[C@H](CC5=CNC6=CC=CC=C56)N	3.17	>128	80.76
14	O=C(N[C@@H](CCCNC(N)=N)C(N[C@@H]([C@@H](C)CC)C(N[C@@H](CCCNC(N)=N)C(N[C@@H](CC1=CNC2=CC=CC=C12)C(N[C@@H](CCCCN)C(N[C@@H]([C@H](O)C)C(N[C@@H](CCCNC(N)=N)C(N[C@@H](CC3=CNC4=CC=CC=C34)C(N[C@@H](CCCNC(N)=N)C(N[C@@H]([C@@H](C)CC)C(N[C@@H](CCCCN)C(N)=O)=O)=O)=O)=O)=O)=O)=O)=O)=O)=O)[C@H](CC5=CNC6=CC=CC=C56)N	2.24	>128	114.29
15	O=C(N[C@@H](CCCNC(N)=N)C(N[C@@H](CC1=CC=CC=C1)C(N[C@@H](CCCNC(N)=N)C(N[C@@H](CC2=CNC3=CC=CC=C23)C(N[C@@H](CCCCN)C(N[C@@H]([C@H](O)C)C(N[C@@H](CCCNC(N)=N)C(N[C@@H](CC4=CNC5=CC=CC=C45)C(N[C@@H](CCCNC(N)=N)C(N[C@@H](CC6=CC=CC=C6)C(N[C@@H](CCCCN)C(N)=O)=O)=O)=O)=O)=O)=O)=O)=O)=O)=O)[C@H](CC7=CNC8=CC=CC=C78)N	2.52	>128	101.59
16	O=C(N[C@@H](CCCNC(N)=N)C(N[C@@H](CC(C)C)C(N[C@@H](CCCNC(N)=N)C(N[C@@H](CC1=CNC2=CC=CC=C12)C(N[C@@H](CCCNC(N)=N)C(N[C@@H]([C@H](O)C)C(N[C@@H](CCCNC(N)=N)C(N[C@@H](CC3=CNC4=CC=CC=C34)C(N[C@@H](CCCNC(N)=N)C(N[C@@H](CC(C)C)C(N[C@@H](CCCNC(N)=N)C(N)=O)=O)=O)=O)=O)=O)=O)=O)=O)=O)=O)[C@H](CC5=CNC6=CC=CC=C56)N	2.83	>128	90.46
17	O=C(N[C@@H](CCCNC(N)=N)C(N[C@@H](CC(C)C)C(N[C@@H](CCCNC(N)=N)C(N[C@@H](CC1=CNC2=CC=CC=C12)C(N[C@@H](CCCNC(N)=N)C(N[C@@H](CC(C)C)C(N[C@@H](CCCNC(N)=N)C(N[C@@H](CC3=CNC4=CC=CC=C34)C(N[C@@H](CCCNC(N)=N)C(N[C@@H](CC(C)C)C(N[C@@H](CCCNC(N)=N)C(N)=O)=O)=O)=O)=O)=O)=O)=O)=O)=O)=O)[C@H](CC5=CNC6=CC=CC=C56)N	2	>128	128
18	O=C(N[C@@H](CCCNC(N)=N)C(N[C@@H](C(C)C)C(N[C@@H](CCCNC(N)=N)C(N[C@@H](CC1=CNC2=CC=CC=C12)C(N[C@@H](CCCNC(N)=N)C(N[C@@H](C(C)C)C(N[C@@H](CCCNC(N)=N)C(N[C@@H](CC3=CNC4=CC=CC=C34)C(N[C@@H](CCCNC(N)=N)C(N[C@@H](C(C)C)C(N[C@@H](CCCNC(N)=N)C(N)=O)=O)=O)=O)=O)=O)=O)=O)=O)=O)=O)[C@H](CC5=CNC6=CC=CC=C56)N	2.24	>128	114.29
19	O=C(N[C@@H](CCCNC(N)=N)C(N[C@@H]([C@H](O)C)C(N[C@@H](CCCNC(N)=N)C(N[C@@H](CC1=CNC2=CC=CC=C12)C(N[C@@H](CCCNC(N)=N)C(N[C@@H]([C@H](O)C)C(N[C@@H](CCCNC(N)=N)C(N[C@@H](CC3=CNC4=CC=CC=C34)C(N[C@@H](CCCNC(N)=N)C(N[C@@H]([C@H](O)C)C(N[C@@H](CCCNC(N)=N)C(N)=O)=O)=O)=O)=O)=O)=O)=O)=O)=O)=O)[C@H](CC5=CNC6=CC=CC=C56)N	5.04	>128	50.79
20	O=C(N[C@@H](CCCNC(N)=N)C(N[C@@H](CC1=CC=CC=C1)C(N[C@@H](CCCNC(N)=N)C(N[C@@H](CC2=CNC3=CC=CC=C23)C(N[C@@H](CCCNC(N)=N)C(N[C@@H](CC4=CC=CC=C4)C(N[C@@H](CCCNC(N)=N)C(N[C@@H](CC5=CNC6=CC=CC=C56)C(N[C@@H](CCCNC(N)=N)C(N[C@@H](CC7=CC=CC=C7)C(N[C@@H](CCCNC(N)=N)C(N)=O)=O)=O)=O)=O)=O)=O)=O)=O)=O)=O)[C@H](CC8=CNC9=CC=CC=C89)N	2.24	64	28.57
21	O=C(N[C@@H](CCCCN)C(N[C@@H](C(C)C)C(N[C@@H](CCCCN)C(N[C@@H](CC1=CNC2=CC=CC=C12)C(N[C@@H](CCCCN)C(N[C@@H](C(C)C)C(N[C@@H](CCCCN)C(N[C@@H](CC3=CNC4=CC=CC=C34)C(N[C@@H](CCCCN)C(N[C@@H](C(C)C)C(N[C@@H](CCCCN)C(N)=O)=O)=O)=O)=O)=O)=O)=O)=O)=O)=O)[C@H](CC5=CNC6=CC=CC=C56)N	1.78	>128	143.82
22	O=C(N[C@@H](CCCCN)C(N[C@@H](CC(C)C)C(N[C@@H](CCCCN)C(N[C@@H](CC1=CNC2=CC=CC=C12)C(N[C@@H](CCCCN)C(N[C@@H](CC(C)C)C(N[C@@H](CCCCN)C(N[C@@H](CC3=CNC4=CC=CC=C34)C(N[C@@H](CCCCN)C(N[C@@H](CC(C)C)C(N[C@@H](CCCCN)C(N)=O)=O)=O)=O)=O)=O)=O)=O)=O)=O)=O)[C@H](CC5=CNC6=CC=CC=C56)N	2.52	128	50.79
23	O=C(N[C@@H](CCCCN)C(N[C@@H]([C@@H](C)CC)C(N[C@@H](CCCCN)C(N[C@@H](CC1=CNC2=CC=CC=C12)C(N[C@@H](CCCCN)C(N[C@@H]([C@@H](C)CC)C(N[C@@H](CCCCN)C(N[C@@H](CC3=CNC4=CC=CC=C34)C(N[C@@H](CCCCN)C(N[C@@H]([C@@H](C)CC)C(N[C@@H](CCCCN)C(N)=O)=O)=O)=O)=O)=O)=O)=O)=O)=O)=O)[C@H](CC5=CNC6=CC=CC=C56)N	2	64	32
24	O=C(N[C@@H](CCCNC(N)=N)C(N[C@@H](C(C)C)C(N[C@@H](CCCNC(N)=N)C(N[C@@H](CC1=CNC2=CC=CC=C12)C(N[C@@H](CCCCN)C(N[C@@H](C(C)C)C(N[C@@H](CCCNC(N)=N)C(N[C@@H](CC3=CNC4=CC=CC=C34)C(N[C@@H](CCCNC(N)=N)C(N[C@@H](C(C)C)C(N[C@@H](CCCCN)C(N)=O)=O)=O)=O)=O)=O)=O)=O)=O)=O)=O)[C@H](CC5=CNC6=CC=CC=C56)N	2	>128	128
